# Supplementary material for: Characterization of tumor-infiltrating lymphocytes and their spatial distribution in triple-negative breast cancer
Source: PubMed Central journal article supplement (PMC11622547; doi:10.1186/s13058-024-01932-4), 2024-12-06
Supplement: 13058_2024_1932_MOESM1_ESM.pdf [file 13058_2024_1932_MOESM1_ESM.pdf]

**Table S1. Clinicopathological characteristics of 36 TNBC patients in the test set**

| <b>Characteristics</b>                  | <b>No (%)</b> |
|-----------------------------------------|---------------|
| Age at primary diagnosis, years         |               |
| <50                                     | 17 (47.2)     |
| ≥50                                     | 19 (52.8)     |
| Sex                                     |               |
| Female                                  | 36 (100.0)    |
| Male                                    | 0 (0.0)       |
| Histologic type                         |               |
| Invasive carcinoma of no special type   | 31 (86.1)     |
| Metaplastic carcinoma                   | 4 (11.1)      |
| Carcinoma with apocrine differentiation | 1 (2.8)       |
| Neoadjuvant chemotherapy                |               |
| Not received                            | 28 (77.8)     |
| Received                                | 8 (22.2)      |
| Disease progression                     |               |
| Not recurred                            | 18 (50.0%)    |
| Recurred                                | 18 (50.0%)    |
| T stage                                 |               |
| 1                                       | 13 (36.1)     |
| 2                                       | 15 (41.7)     |
| 3                                       | 7 (19.4)      |
| 4                                       | 1 (2.8)       |
| N stage                                 |               |
| 0                                       | 21 (58.3)     |
| 1                                       | 6 (16.7)      |
| 2                                       | 4 (11.1)      |
| 3                                       | 5 (13.9)      |
| Lymphovascular invasion                 |               |
| Absent                                  | 22 (61.1)     |
| Present                                 | 14 (38.9)     |
| Histologic grade                        |               |
| I                                       | 0 (0.0)       |
| II                                      | 2 (5.6)       |
| III                                     | 34 (94.4)     |
| DCIS component                          |               |
| Absent                                  | 10 (27.8)     |
| Present                                 | 26 (72.2)     |
| Multicentricity                         |               |
| Absent                                  | 27 (75.0)     |
| Present                                 | 9 (25.0)      |
| Tumor-infiltrating lymphocyte           |               |
| <10%                                    | 19 (52.8)     |
| ≥10% and <50%                           | 15 (41.7)     |
| ≥50%                                    | 2 (5.6)       |
| Ki-67 index                             |               |
| <50%                                    | 16 (44.4)     |
| ≥50%                                    | 20 (55.6)     |
| p53 overexpression,                     |               |
| Absent                                  | 16 (44.4)     |
| Present                                 | 20 (55.6)     |
| Basal phenotype                         |               |
| Absent                                  | 6 (16.7)      |
| Present                                 | 30 (83.3)     |

TNBC, triple-negative breast cancer; DCIS, ductal carcinoma in situ;

**Table S2. Clinicopathological characteristics of 155 TNBC patients in the validation set**

| <b>Characteristics</b>                  | <b>No (%)</b> |
|-----------------------------------------|---------------|
| Age at primary diagnosis, years         |               |
| <50                                     | 84 (54.2)     |
| ≥50                                     | 71 (45.8)     |
| Sex                                     |               |
| Female                                  | 155 (100.0)   |
| Male                                    | 0 (0.0)       |
| Histologic type                         |               |
| Invasive carcinoma of no special type   | 142 (91.6)    |
| Carcinoma with apocrine differentiation | 12 (7.7)      |
| Metaplastic carcinoma                   | 1 (0.6)       |
| T stage                                 |               |
| 1                                       | 63 (40.6)     |
| 2                                       | 85 (54.8)     |
| 3                                       | 6 (3.9)       |
| 4                                       | 1 (0.6)       |
| N stage                                 |               |
| 0                                       | 116 (74.8)    |
| 1                                       | 24 (15.5)     |
| 2                                       | 8 (5.2)       |
| 3                                       | 7 (4.5)       |
| M stage                                 |               |
| 0                                       | 155 (100.0)   |
| 1                                       | 0 (0.0)       |
| AJCC stage                              |               |
| I                                       | 52 (33.5)     |
| II                                      | 88 (56.8)     |
| III                                     | 15 (9.7)      |
| IV                                      | 0 (0.0)       |
| Lymphovascular invasion                 |               |
| Absent                                  | 99 (63.9)     |
| Present                                 | 56 (36.1)     |
| Histologic grade                        |               |
| I                                       | 0 (0.0)       |
| II                                      | 13 (8.4)      |
| III                                     | 142 (91.6)    |
| Nuclear pleomorphism                    |               |
| 1                                       | 0 (0.0)       |
| 2                                       | 11 (7.1)      |
| 3                                       | 144 (92.9)    |
| DCIS component                          |               |
| Absent                                  | 46 (29.7)     |
| Present                                 | 109 (70.3)    |
| Tumor border                            |               |
| Pushing                                 | 95 (61.3)     |
| Infiltrative                            | 60 (38.7)     |
| Multicentricity                         |               |
| Absent                                  | 130 (83.9)    |
| Present                                 | 25 (16.1)     |
| Tumor-infiltrating lymphocyte           |               |
| <10%                                    | 48 (31.0)     |
| ≥10% and <50%                           | 58 (37.4)     |
| ≥50%                                    | 49 (31.6)     |
| Ki-67 index                             |               |
| <50%                                    | 82 (52.9)     |

---

|                     |            |
|---------------------|------------|
| $\geq 50\%$         | 73 (47.1)  |
| p53 overexpression, |            |
| Absent              | 69 (44.5)  |
| Present             | 86 (55.5)  |
| Basal phenotype     |            |
| Absent              | 23 (14.8)  |
| Present             | 132 (85.2) |

---

TNBC, triple-negative breast cancer; DCIS, ductal carcinoma in situ

**Table S3. Correlation between tumor-infiltrating lymphocyte and its subsets**

| Variables             | TIL                   | CD4 <sup>+</sup> TIL  | CD8 <sup>+</sup> TIL  | CD56 <sup>+</sup> TIL | CD57 <sup>+</sup> TIL | GNLY <sup>+</sup> TIL | GZMB <sup>+</sup> TIL |
|-----------------------|-----------------------|-----------------------|-----------------------|-----------------------|-----------------------|-----------------------|-----------------------|
| TIL                   | 1                     |                       |                       |                       |                       |                       |                       |
| CD4 <sup>+</sup> TIL  | 0.589<br>( $<0.001$ ) | 1                     |                       |                       |                       |                       |                       |
| CD8 <sup>+</sup> TIL  | 0.557<br>( $<0.001$ ) | 0.806<br>( $<0.001$ ) | 1                     |                       |                       |                       |                       |
| CD56 <sup>+</sup> TIL | 0.565<br>( $<0.001$ ) | 0.625<br>( $<0.001$ ) | 0.535<br>( $<0.001$ ) | 1                     |                       |                       |                       |
| CD57 <sup>+</sup> TIL | 0.631<br>( $<0.001$ ) | 0.671<br>( $<0.001$ ) | 0.671<br>( $<0.001$ ) | 0.589<br>( $<0.001$ ) | 1                     |                       |                       |
| GNLY <sup>+</sup> TIL | 0.718<br>( $<0.001$ ) | 0.690<br>( $<0.001$ ) | 0.621<br>( $<0.001$ ) | 0.697<br>( $<0.001$ ) | 0.719<br>( $<0.001$ ) | 1                     |                       |
| GZMB <sup>+</sup> TIL | 0.582<br>( $<0.001$ ) | 0.551<br>( $<0.001$ ) | 0.553<br>( $<0.001$ ) | 0.534<br>( $<0.001$ ) | 0.621<br>( $<0.001$ ) | 0.740<br>( $<0.001$ ) | 1                     |

Rho correlation coefficients calculated by Spearman's rank correlation test are presented with *p* values in parentheses.  
TIL, tumor-infiltrating lymphocyte; GNLY, granulysin; GZMB, granzyme B

**Table S4. Correlation between tumor-infiltrating lymphocyte and its subset ratios**

| Variables                           | TIL               | CD4 <sup>+</sup> /CD8 <sup>+</sup> | CD56 <sup>+</sup> /CD8 <sup>+</sup> | CD57 <sup>+</sup> /CD8 <sup>+</sup> | GNLY <sup>+</sup> /CD8 <sup>+</sup> | GZMB <sup>+</sup> /CD8 <sup>+</sup> | CD56 <sup>+</sup> /CD4 <sup>+</sup> | CD57 <sup>+</sup> /CD4 <sup>+</sup> | GNLY <sup>+</sup> /CD4 <sup>+</sup> | GZMB <sup>+</sup> /CD4 <sup>+</sup> |
|-------------------------------------|-------------------|------------------------------------|-------------------------------------|-------------------------------------|-------------------------------------|-------------------------------------|-------------------------------------|-------------------------------------|-------------------------------------|-------------------------------------|
| TIL                                 | 1                 |                                    |                                     |                                     |                                     |                                     |                                     |                                     |                                     |                                     |
| CD4 <sup>+</sup> /CD8 <sup>+</sup>  | 0.158<br>(0.051)  | 1                                  |                                     |                                     |                                     |                                     |                                     |                                     |                                     |                                     |
| CD56 <sup>+</sup> /CD8 <sup>+</sup> | 0.413<br>(<0.001) | 0.295<br>(<0.001)                  | 1                                   |                                     |                                     |                                     |                                     |                                     |                                     |                                     |
| CD57 <sup>+</sup> /CD8 <sup>+</sup> | 0.387<br>(<0.001) | 0.242<br>(0.003)                   | 0.300<br>(<0.001)                   | 1                                   |                                     |                                     |                                     |                                     |                                     |                                     |
| GNLY <sup>+</sup> /CD8 <sup>+</sup> | 0.528<br>(<0.001) | 0.386<br>(<0.001)                  | 0.477<br>(<0.001)                   | 0.507<br>(<0.001)                   | 1                                   |                                     |                                     |                                     |                                     |                                     |
| GZMB <sup>+</sup> /CD8 <sup>+</sup> | 0.434<br>(<0.001) | 0.115<br>(0.156)                   | 0.339<br>(<0.001)                   | 0.336<br>(<0.001)                   | 0.558<br>(<0.001)                   | 1                                   |                                     |                                     |                                     |                                     |
| CD56 <sup>+</sup> /CD4 <sup>+</sup> | 0.394<br>(<0.001) | 0.020<br>(0.810)                   | 0.924<br>(<0.001)                   | 0.218<br>(0.007)                    | 0.387<br>(<0.001)                   | 0.297<br>(<0.001)                   | 1                                   |                                     |                                     |                                     |
| CD57 <sup>+</sup> /CD4 <sup>+</sup> | 0.351<br>(<0.001) | -0.255<br>(0.002)                  | 0.115<br>(0.162)                    | 0.817<br>(<0.001)                   | 0.358<br>(<0.001)                   | 0.272<br>(0.001)                    | 0.234<br>(0.004)                    | 1                                   |                                     |                                     |
| GNLY <sup>+</sup> /CD4 <sup>+</sup> | 0.474<br>(<0.001) | -0.151<br>(0.066)                  | 0.351<br>(<0.001)                   | 0.407<br>(<0.001)                   | 0.830<br>(<0.001)                   | 0.505<br>(<0.001)                   | 0.431<br>(<0.001)                   | 0.545<br>(<0.001)                   | 1                                   |                                     |
| GZMB <sup>+</sup> /CD4 <sup>+</sup> | 0.377<br>(<0.001) | -0.156<br>(0.057)                  | 0.254<br>(0.002)                    | 0.309<br>(<0.001)                   | 0.460<br>(<0.001)                   | 0.953<br>(<0.001)                   | 0.269<br>(0.001)                    | 0.342<br>(<0.001)                   | 0.524<br>(<0.001)                   | 1                                   |

Rho correlation coefficients calculated by Spearman's rank correlation test are presented with *p* values in parentheses.

TIL, tumor-infiltrating lymphocyte; GNLY, granzysin; GZMB, granzyme B

**Table S5. Relationships between TIL levels and clinicopathological features of tumors**

| Clinicopathological features |                     | Low-TIL group<br>(n=48) | High-TIL group<br>(n=107) | p value |
|------------------------------|---------------------|-------------------------|---------------------------|---------|
| Age (years)                  |                     |                         |                           | 0.293   |
|                              | <50                 | 23 (47.9)               | 61 (57.0)                 |         |
|                              | ≥50                 | 25 (52.1)               | 46 (43.0)                 |         |
| Histologic type              |                     |                         |                           | 0.755   |
|                              | IC-NST              | 45 (93.8)               | 97 (90.7)                 |         |
|                              | Others <sup>a</sup> | 3 (6.3)                 | 10 (9.3)                  |         |
| T stage                      |                     |                         |                           | 0.030   |
|                              | T1-2                | 43 (89.6)               | 105 (98.1)                |         |
|                              | T3-4                | 5 (10.4)                | 2 (1.9)                   |         |
| N stage                      |                     |                         |                           | 0.116   |
|                              | N0                  | 32 (66.7)               | 84 (78.5)                 |         |
|                              | N1-3                | 16 (33.3)               | 23 (21.5)                 |         |
| AJCC stage                   |                     |                         |                           | 0.382   |
|                              | I                   | 15 (31.3)               | 37 (34.6)                 |         |
|                              | II                  | 26 (54.2)               | 62 (57.9)                 |         |
|                              | III                 | 7 (14.6)                | 8 (7.5)                   |         |
| Lymphovascular invasion      |                     |                         |                           | 0.006   |
|                              | Absent              | 23 (47.9)               | 76 (71.0)                 |         |
|                              | Present             | 25 (52.1)               | 31 (29.0)                 |         |
| Histologic grade             |                     |                         |                           | 0.112   |
|                              | II                  | 7 (14.6)                | 6 (5.6)                   |         |
|                              | III                 | 41 (85.4)               | 101 (94.4)                |         |
| Nuclear pleomorphism         |                     |                         |                           | 0.036   |
|                              | 2                   | 7 (14.6)                | 4 (3.7)                   |         |
|                              | 3                   | 41 (85.4)               | 103 (96.3)                |         |
| DCIS component               |                     |                         |                           | 0.006   |
|                              | Absent              | 7 (14.6)                | 39 (36.4)                 |         |
|                              | Present             | 41 (85.4)               | 68 (63.6)                 |         |
| Tumor border                 |                     |                         |                           | 0.022   |
|                              | Pushing             | 23 (47.9)               | 72 (67.3)                 |         |
|                              | Infiltrative        | 25 (52.1)               | 35 (32.7)                 |         |
| Multicentricity              |                     |                         |                           | 0.552   |
|                              | Absent              | 39 (81.3)               | 91 (85.0)                 |         |
|                              | Present             | 9 (18.8)                | 16 (15.0)                 |         |
| Ki-67 index                  |                     |                         |                           | 0.051   |
|                              | <50%                | 31 (64.6)               | 51 (47.7)                 |         |
|                              | ≥50%                | 17 (35.4)               | 56 (52.3)                 |         |
| p53 overexpression           |                     |                         |                           | 0.568   |
|                              | Absent              | 23 (47.9)               | 46 (43.0)                 |         |
|                              | Present             | 25 (52.1)               | 61 (57.0)                 |         |
| Basal phenotype              |                     |                         |                           | 0.668   |
|                              | Absent              | 8 (16.7)                | 15 (14.0)                 |         |
|                              | Present             | 40 (83.3)               | 92 (86.0)                 |         |

<sup>a</sup>Include metaplastic carcinoma and carcinoma with apocrine differentiation

Numbers in parentheses indicate column percentage.

TIL, tumor-infiltrating lymphocyte; IC-NST, invasive carcinoma of no special type; AJCC, American Joint Committee on Cancer; DCIS, ductal carcinoma in situ

**Table S6. Relationship between clinicopathological characteristics and TIL subset ratios using CD8<sup>+</sup> TIL**

| Characteristics      | CD4 <sup>+</sup> /CD8 <sup>+</sup> TIL |         | CD56 <sup>+</sup> /CD8 <sup>+</sup> TIL |         | CD57 <sup>+</sup> /CD8 <sup>+</sup> TIL |         | GNLY <sup>+</sup> /CD8 <sup>+</sup> TIL |         | GZMB <sup>+</sup> /CD8 <sup>+</sup> TIL |         |
|----------------------|----------------------------------------|---------|-----------------------------------------|---------|-----------------------------------------|---------|-----------------------------------------|---------|-----------------------------------------|---------|
|                      | ratio                                  | p value | ratio                                   | p value | ratio                                   | p value | ratio                                   | p value | ratio                                   | p value |
| Age (year)           |                                        | 0.006   |                                         | 0.031   |                                         | 0.562   |                                         | 0.063   |                                         | 0.225   |
| <50                  | 1.10<br>(0.73-1.53)                    |         | 0.01<br>(0.00-0.02)                     |         | 0.03<br>(0.01-0.06)                     |         | 0.07<br>(0.03-0.17)                     |         | 0.05<br>(0.01-0.18)                     |         |
| ≥50                  | 0.83<br>(0.52-1.21)                    |         | 0.00<br>(0.00-0.02)                     |         | 0.03<br>(0.01-0.05)                     |         | 0.05<br>(0.01-0.14)                     |         | 0.03<br>(0.01-0.10)                     |         |
| Histologic type      |                                        | 0.363   |                                         | 0.704   |                                         | 0.543   |                                         | 0.471   |                                         | 0.573   |
| IC-NST               | 0.94<br>(0.63-1.50)                    |         | 0.01<br>(0.00-0.02)                     |         | 0.03<br>(0.01-0.06)                     |         | 0.06<br>(0.02-0.15)                     |         | 0.04<br>(0.01-0.14)                     |         |
| Others <sup>a</sup>  | 0.87<br>(0.53-1.17)                    |         | 0.01<br>(0.00-0.04)                     |         | 0.03<br>(0.01-0.04)                     |         | 0.04<br>(0.01-0.16)                     |         | 0.02<br>(0.01-0.12)                     |         |
| T stage              |                                        | 0.209   |                                         | 0.662   |                                         | 0.819   |                                         | 0.034   |                                         | 0.126   |
| T1-2                 | 0.94<br>(0.63-1.47)                    |         | 0.01<br>(0.00-0.02)                     |         | 0.03<br>(0.01-0.06)                     |         | 0.06<br>(0.02-0.16)                     |         | 0.04<br>(0.01-0.15)                     |         |
| T3-4                 | 0.80<br>(0.14-1.06)                    |         | 0.00<br>(0.00-0.04)                     |         | 0.03<br>(0.01-0.13)                     |         | 0.03<br>(0.00-0.05)                     |         | 0.01<br>(0.00-0.06)                     |         |
| N stage              |                                        | 0.738   |                                         | 0.422   |                                         | 0.475   |                                         | 0.153   |                                         | 0.133   |
| N0                   | 0.91<br>(0.61-1.35)                    |         | 0.01<br>(0.00-0.02)                     |         | 0.03<br>(0.01-0.06)                     |         | 0.06<br>(0.03-0.17)                     |         | 0.05<br>(0-0.14)                        |         |
| N1-3                 | 1.00<br>(0.64-1.61)                    |         | 0.01<br>(0.00-0.02)                     |         | 0.03<br>(0.01-0.05)                     |         | 0.05<br>(0.01-0.12)                     |         | 0.02<br>(0-0.15)                        |         |
| AJCC stage           |                                        | 0.115   |                                         | 0.169   |                                         | 0.195   |                                         | 0.246   |                                         | 0.065   |
| I-II                 | 0.94<br>(0.63-1.48)                    |         | 0.01<br>(0.00-0.02)                     |         | 0.03<br>(0.01-0.06)                     |         | 0.06<br>(0.02-0.16)                     |         | 0.04<br>(0.01-0.15)                     |         |
| III                  | 0.77<br>(0.34-1.13)                    |         | 0.00<br>(0.00-0.02)                     |         | 0.02<br>(0.01-0.04)                     |         | 0.04<br>(0.03-0.07)                     |         | 0.01<br>(0.00-0.05)                     |         |
| LVI                  |                                        | 0.611   |                                         | 0.004   |                                         | 0.002   |                                         | 0.008   |                                         | 0.116   |
| Absent               | 0.95<br>(0.61-1.39)                    |         | 0.01<br>(0.00-0.03)                     |         | 0.04<br>(0.01-0.07)                     |         | 0.08<br>(0.03-0.18)                     |         | 0.04<br>(0.01-0.16)                     |         |
| Present              | 0.91<br>(0.63-1.51)                    |         | 0.00<br>(0.00-0.02)                     |         | 0.02<br>(0.01-0.04)                     |         | 0.05<br>(0.01-0.08)                     |         | 0.02<br>(0.00-0.12)                     |         |
| Histologic grade     |                                        | 0.624   |                                         | 0.069   |                                         | 0.092   |                                         | 0.003   |                                         | 0.070   |
| II                   | 0.94<br>(0.53-1.47)                    |         | 0.00<br>(0.00-0.01)                     |         | 0.02<br>(0.00-0.04)                     |         | 0.02<br>(0.00-0.05)                     |         | 0.01<br>(0.00-0.08)                     |         |
| III                  | 0.92<br>(0.64-1.42)                    |         | 0.01<br>(0.00-0.02)                     |         | 0.03<br>(0.01-0.06)                     |         | 0.07<br>(0.03-0.17)                     |         | 0.04<br>(0.01-0.15)                     |         |
| Nuclear pleomorphism |                                        | 0.631   |                                         | 0.561   |                                         | 0.811   |                                         | 0.022   |                                         | 0.482   |
| 2                    | 1.20<br>(0.51-1.41)                    |         | 0.00<br>(0.00-0.03)                     |         | 0.03<br>(0.00-0.07)                     |         | 0.01<br>(0.00-0.06)                     |         | 0.01<br>(0.00-0.16)                     |         |
| 3                    | 0.92<br>(0.64-1.44)                    |         | 0.01<br>(0.00-0.02)                     |         | 0.03<br>(0.01-0.06)                     |         | 0.06<br>(0.03-0.16)                     |         | 0.04<br>(0.01-0.14)                     |         |
| DCIS component       |                                        | 0.517   |                                         | 0.006   |                                         | 0.034   |                                         | 0.009   |                                         | 0.073   |
| Absent               | 0.99<br>(0.65-1.41)                    |         | 0.02<br>(0.00-0.03)                     |         | 0.04<br>(0.02-0.09)                     |         | 0.10<br>(0.03-0.20)                     |         | 0.07<br>(0.01-0.16)                     |         |
| Present              | 0.91<br>(0.61-1.47)                    |         | 0.01<br>(0.00-0.02)                     |         | 0.03<br>(0.01-0.05)                     |         | 0.06<br>(0.02-0.13)                     |         | 0.03<br>(0.00-0.14)                     |         |
| Tumor border         |                                        | 0.603   |                                         | 0.102   |                                         | 0.053   |                                         | <0.001  |                                         | 0.003   |
| Pushing              | 0.94<br>(0.64-1.37)                    |         | 0.01<br>(0.00-0.03)                     |         | 0.04<br>(0.01-0.06)                     |         | 0.09<br>(0.03-0.20)                     |         | 0.06<br>(0.01-0.16)                     |         |
| Infiltrative         | 0.88<br>(0.54-1.53)                    |         | 0.01<br>(0.00-0.02)                     |         | 0.03<br>(0.01-0.05)                     |         | 0.04<br>(0.01-0.07)                     |         | 0.01<br>(0.00-0.07)                     |         |
| Multicentricity      |                                        | 0.969   |                                         | 0.869   |                                         | 0.274   |                                         | 0.765   |                                         | 0.646   |
| Absent               | 0.92<br>(0.63-1.42)                    |         | 0.01<br>(0.00-0.02)                     |         | 0.03<br>(0.01-0.06)                     |         | 0.06<br>(0.02-0.16)                     |         | 0.03<br>(0.01-0.14)                     |         |
| Present              | 0.94<br>(0.60-1.49)                    |         | 0.01<br>(0.00-0.02)                     |         | 0.02<br>(0.00-0.05)                     |         | 0.06<br>(0.02-0.13)                     |         | 0.04<br>(0.00-0.15)                     |         |
| p53 overexpression   |                                        | 0.608   |                                         | 0.744   |                                         | 0.490   |                                         | 0.297   |                                         | 0.922   |
| Absent               | 0.89<br>(0.64-1.34)                    |         | 0.01<br>(0.00-0.02)                     |         | 0.03<br>(0.01-0.05)                     |         | 0.06<br>(0.02-0.13)                     |         | 0.04<br>(0.01-0.14)                     |         |
| Present              | 0.96<br>(0.61-1.55)                    |         | 0.01<br>(0.00-0.02)                     |         | 0.03<br>(0.01-0.06)                     |         | 0.06<br>(0.03-0.18)                     |         | 0.03<br>(0.01-0.16)                     |         |
| Ki-67 index          |                                        | 0.578   |                                         | 0.025   |                                         | 0.294   |                                         | 0.006   |                                         | 0.128   |
| <50%                 | 0.93<br>(0.56-1.52)                    |         | 0.01<br>(0.00-0.02)                     |         | 0.03<br>(0.01-0.06)                     |         | 0.05<br>(0.01-0.14)                     |         | 0.02<br>(0.00-0.14)                     |         |
| ≥50%                 | 0.93<br>(0.65-1.37)                    |         | 0.01<br>(0.00-0.02)                     |         | 0.03<br>(0.02-0.06)                     |         | 0.09<br>(0.04-0.18)                     |         | 0.05<br>(0.01-0.16)                     |         |
| Basal phenotype      |                                        | 0.051   |                                         | 0.209   |                                         | 0.913   |                                         | 0.972   |                                         | 0.631   |
| Absent               | 0.76<br>(0.48-1.10)                    |         | 0.01<br>(0.00-0.03)                     |         | 0.04<br>(0.00-0.06)                     |         | 0.06<br>(0.01-0.22)                     |         | 0.03<br>(0.00-0.15)                     |         |
| Present              | 0.96<br>(0.64-1.52)                    |         | 0.01<br>(0.00-0.02)                     |         | 0.03<br>(0.01-0.06)                     |         | 0.06<br>(0.03-0.14)                     |         | 0.04<br>(0.01-0.14)                     |         |

Data are presented as median (interquartile range), and p values were calculated by Mann-Whitney U test.

<sup>a</sup>Includes metaplastic carcinoma and carcinoma with apocrine differentiation

TIL, tumor-infiltrating lymphocyte; GNLY, granulysin; GZMB, granzyme B; IC-NST, invasive carcinoma of no special type; AJCC, American Joint Committee on Cancer; LVI, lymphovascular invasion; DCIS, ductal carcinoma in situ

**Table S7. Relationship between clinicopathological characteristics and TIL subset ratios using CD4<sup>+</sup> TIL**

| Characteristics      | CD56 <sup>+</sup> /CD4 <sup>+</sup> TIL |                | CD57 <sup>+</sup> /CD4 <sup>+</sup> TIL |                | GNLY <sup>+</sup> /CD4 <sup>+</sup> TIL |                | GZMB <sup>+</sup> /CD4 <sup>+</sup> TIL |                |
|----------------------|-----------------------------------------|----------------|-----------------------------------------|----------------|-----------------------------------------|----------------|-----------------------------------------|----------------|
|                      | ratio                                   | <i>p</i> value | ratio                                   | <i>p</i> value | ratio                                   | <i>p</i> value | ratio                                   | <i>p</i> value |
| Age (year)           |                                         | 0.039          |                                         | 0.656          |                                         | 0.415          |                                         | 0.907          |
| <50                  | 0.01<br>(0.00-0.02)                     |                | 0.03<br>(0.01-0.06)                     |                | 0.07<br>(0.03-0.17)                     |                | 0.04<br>(0.01-0.16)                     |                |
| ≥50                  | 0.01<br>(0.00-0.02)                     |                | 0.03<br>(0.01-0.08)                     |                | 0.06<br>(0.02-0.13)                     |                | 0.04<br>(0.01-0.11)                     |                |
| Histologic type      |                                         | 0.840          |                                         | 0.415          |                                         | 0.925          |                                         | 0.912          |
| IC-NST               | 0.01<br>(0.00-0.02)                     |                | 0.03<br>(0.01-0.07)                     |                | 0.06<br>(0.03-0.14)                     |                | 0.04<br>(0.01-0.15)                     |                |
| Others <sup>a</sup>  | 0.01<br>(0.00-0.03)                     |                | 0.03<br>(0.01-0.05)                     |                | 0.09<br>(0.01-0.23)                     |                | 0.02<br>(0.01-0.16)                     |                |
| T stage              |                                         | 0.214          |                                         | 0.702          |                                         | 0.115          |                                         | 0.275          |
| T1-2                 | 0.01<br>(0.00-0.02)                     |                | 0.03<br>(0.01-0.06)                     |                | 0.06<br>(0.03-0.14)                     |                | 0.04<br>(0.01-0.15)                     |                |
| T3-4                 | 0.00<br>(0.00-0.02)                     |                | 0.03<br>(0.00-0.10)                     |                | 0.04<br>(0.01-0.06)                     |                | 0.01<br>(0.00-0.10)                     |                |
| N stage              |                                         | 0.208          |                                         | 0.158          |                                         | 0.068          |                                         | 0.077          |
| N0                   | 0.01<br>(0.00-0.02)                     |                | 0.04<br>(0.01-0.07)                     |                | 0.07<br>(0.03-0.18)                     |                | 0.04<br>(0.01-0.16)                     |                |
| N1-3                 | 0.01<br>(0.00-0.01)                     |                | 0.03<br>(0.01-0.05)                     |                | 0.04<br>(0.03-0.12)                     |                | 0.02<br>(0.00-0.11)                     |                |
| AJCC stage           |                                         | 0.248          |                                         | 0.397          |                                         | 0.878          |                                         | 0.085          |
| I-II                 | 0.01<br>(0.00-0.02)                     |                | 0.03<br>(0.01-0.06)                     |                | 0.06<br>(0.03-0.14)                     |                | 0.04<br>(0.01-0.16)                     |                |
| III                  | 0.00<br>(0.00-0.02)                     |                | 0.02<br>(0.01-0.05)                     |                | 0.07<br>(0.03-0.14)                     |                | 0.01<br>(0.00-0.05)                     |                |
| LVI                  |                                         | 0.002          |                                         | 0.005          |                                         | 0.013          |                                         | 0.073          |
| Absent               | 0.01<br>(0.00-0.03)                     |                | 0.04<br>(0.02-0.07)                     |                | 0.08<br>(0.03-0.18)                     |                | 0.04<br>(0.01-0.17)                     |                |
| Present              | 0.01<br>(0.00-0.01)                     |                | 0.02<br>(0.01-0.05)                     |                | 0.04<br>(0.02-0.10)                     |                | 0.02<br>(0.00-0.09)                     |                |
| Histologic grade     |                                         | 0.106          |                                         | 0.035          |                                         | 0.001          |                                         | 0.051          |
| II                   | 0.00<br>(0.00-0.01)                     |                | 0.02<br>(0.00-0.03)                     |                | 0.02<br>(0.01-0.05)                     |                | 0.01<br>(0.00-0.08)                     |                |
| III                  | 0.01<br>(0.00-0.02)                     |                | 0.04<br>(0.01-0.07)                     |                | 0.07<br>(0.03-0.15)                     |                | 0.04<br>(0.01-0.16)                     |                |
| Nuclear pleomorphism |                                         | 0.571          |                                         | 0.512          |                                         | 0.007          |                                         | 0.319          |
| 2                    | 0.00<br>(0.00-0.02)                     |                | 0.03<br>(0.01-0.06)                     |                | 0.01<br>(0.00-0.06)                     |                | 0.01<br>(0.00-0.13)                     |                |
| 3                    | 0.01<br>(0.00-0.02)                     |                | 0.03<br>(0.01-0.06)                     |                | 0.07<br>(0.03-0.14)                     |                | 0.04<br>(0.01-0.15)                     |                |
| DCIS component       |                                         | 0.004          |                                         | 0.097          |                                         | 0.008          |                                         | 0.047          |
| Absent               | 0.01<br>(0.01-0.03)                     |                | 0.04<br>(0.01-0.07)                     |                | 0.09<br>(0.04-0.22)                     |                | 0.06<br>(0.02-0.18)                     |                |
| Present              | 0.01<br>(0.00-0.02)                     |                | 0.03<br>(0.01-0.06)                     |                | 0.05<br>(0.02-0.12)                     |                | 0.03<br>(0.01-0.13)                     |                |
| Tumor border         |                                         | 0.052          |                                         | 0.055          |                                         | <0.001         |                                         | 0.003          |
| Pushing              | 0.01<br>(0.00-0.03)                     |                | 0.04<br>(0.02-0.07)                     |                | 0.09<br>(0.04-0.20)                     |                | 0.06<br>(0.02-0.17)                     |                |
| Infiltrative         | 0.01<br>(0.00-0.02)                     |                | 0.03<br>(0.01-0.05)                     |                | 0.04<br>(0.02-0.09)                     |                | 0.02<br>(0.00-0.08)                     |                |
| Multicentricity      |                                         | 0.553          |                                         | 0.154          |                                         | 0.596          |                                         | 0.502          |
| Absent               | 0.01<br>(0.00-0.02)                     |                | 0.03<br>(0.01-0.07)                     |                | 0.06<br>(0.03-0.14)                     |                | 0.04<br>(0.01-0.15)                     |                |
| Present              | 0.01<br>(0.00-0.01)                     |                | 0.02<br>(0.01-0.05)                     |                | 0.06<br>(0.02-0.15)                     |                | 0.04<br>(0.00-0.12)                     |                |
| p53 overexpression   |                                         | 0.540          |                                         | 0.309          |                                         | 0.392          |                                         | 0.869          |
| Absent               | 0.01<br>(0.00-0.02)                     |                | 0.03<br>(0.01-0.06)                     |                | 0.06<br>(0.02-0.15)                     |                | 0.04<br>(0.01-0.13)                     |                |
| Present              | 0.01<br>(0.00-0.02)                     |                | 0.03<br>(0.01-0.07)                     |                | 0.07<br>(0.03-0.14)                     |                | 0.03<br>(0.01-0.16)                     |                |
| Ki-67 index          |                                         | 0.012          |                                         | 0.527          |                                         | 0.015          |                                         | 0.093          |
| <50%                 | 0.01<br>(0.00-0.02)                     |                | 0.03<br>(0.01-0.07)                     |                | 0.05<br>(0.02-0.13)                     |                | 0.03<br>(0.01-0.13)                     |                |
| ≥50%                 | 0.01<br>(0.00-0.03)                     |                | 0.04<br>(0.02-0.06)                     |                | 0.08<br>(0.04-0.20)                     |                | 0.05<br>(0.01-0.16)                     |                |
| Basal phenotype      |                                         | 0.061          |                                         | 0.753          |                                         | 0.282          |                                         | 0.728          |
| Absent               | 0.02<br>(0.00-0.03)                     |                | 0.03<br>(0.01-0.08)                     |                | 0.10<br>(0.02-0.23)                     |                | 0.05<br>(0.01-0.15)                     |                |
| Present              | 0.01<br>(0.00-0.02)                     |                | 0.03<br>(0.01-0.06)                     |                | 0.06<br>(0.03-0.13)                     |                | 0.04<br>(0.01-0.15)                     |                |

Data are presented as median (interquartile range), and *p* values were calculated by Mann-Whitney U test.

<sup>a</sup>Includes metaplastic carcinoma and carcinoma with apocrine differentiation

TIL, tumor-infiltrating lymphocyte; GNLY, granulysin; GZMB, granzyme B; IC-NST, invasive carcinoma of no special type; AJCC, American Joint Committee on Cancer; LVI, lymphovascular invasion; DCIS, ductal carcinoma in situ



**Table S8. Distribution of tumor-infiltrating lymphocyte and its subsets**

| Distribution of TIL and its subsets | No (%)    |
|-------------------------------------|-----------|
| TIL                                 |           |
| High in all slides                  | 22 (14.2) |
| Heterogeneous                       | 50 (32.3) |
| Low in all slides                   | 83 (53.5) |
| CD4 <sup>+</sup> TIL                |           |
| Low in all cores                    | 51 (32.9) |
| Heterogeneous                       | 74 (47.7) |
| High in all cores                   | 25 (16.1) |
| Inconclusive                        | 5 (3.2)   |
| CD8 <sup>+</sup> TIL                |           |
| Low in all cores                    | 44 (28.4) |
| Heterogeneous                       | 67 (43.2) |
| High in all cores                   | 35 (22.6) |
| Inconclusive                        | 9 (5.8)   |
| CD56 <sup>+</sup> TIL               |           |
| Low in all cores                    | 53 (34.2) |
| Heterogeneous                       | 57 (36.8) |
| High in all cores                   | 38 (24.5) |
| Inconclusive                        | 7 (4.5)   |
| CD57 <sup>+</sup> TIL               |           |
| Low in all cores                    | 51 (32.9) |
| Heterogeneous                       | 69 (44.5) |
| High in all cores                   | 28 (18.1) |
| Inconclusive                        | 7 (4.5)   |
| GPLY <sup>+</sup> TIL               |           |
| Low in all cores                    | 45 (29.0) |
| Heterogeneous                       | 65 (41.9) |
| High in all cores                   | 38 (24.5) |
| Inconclusive                        | 7 (4.5)   |
| GZMB <sup>+</sup> TIL               |           |
| Low in all cores                    | 63 (40.6) |
| Heterogeneous                       | 57 (36.8) |
| High in all cores                   | 31 (20.0) |
| Inconclusive                        | 4 (2.6)   |

TIL, tumor-infiltrating lymphocyte; GPLY, granulysin; GZMB, granzyme B
